# Supplementary material
Source: PubMed Central journal article supplement (PMC5161594)

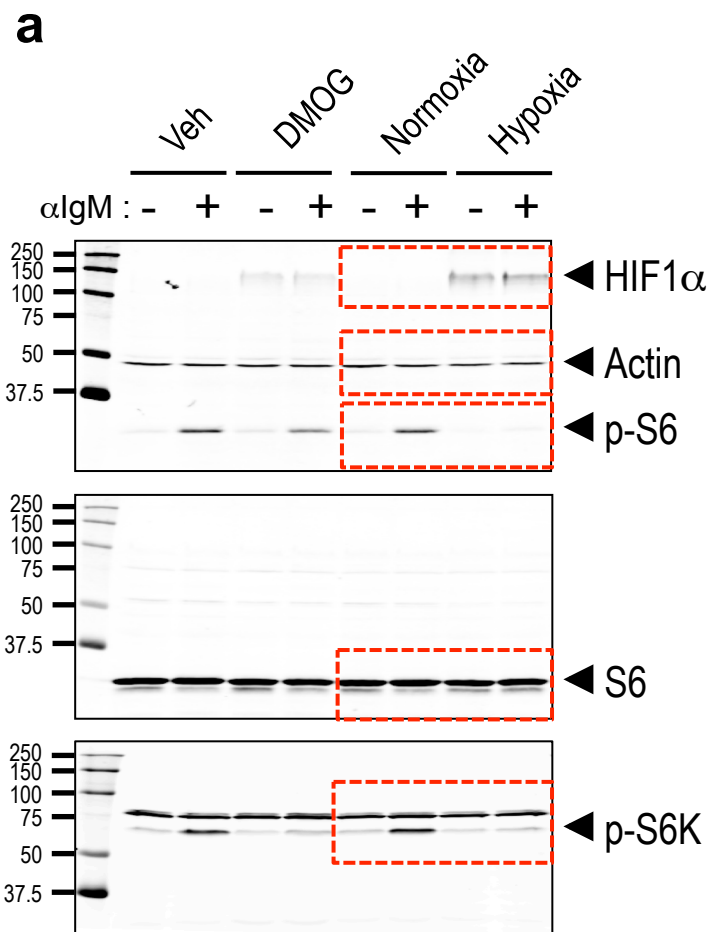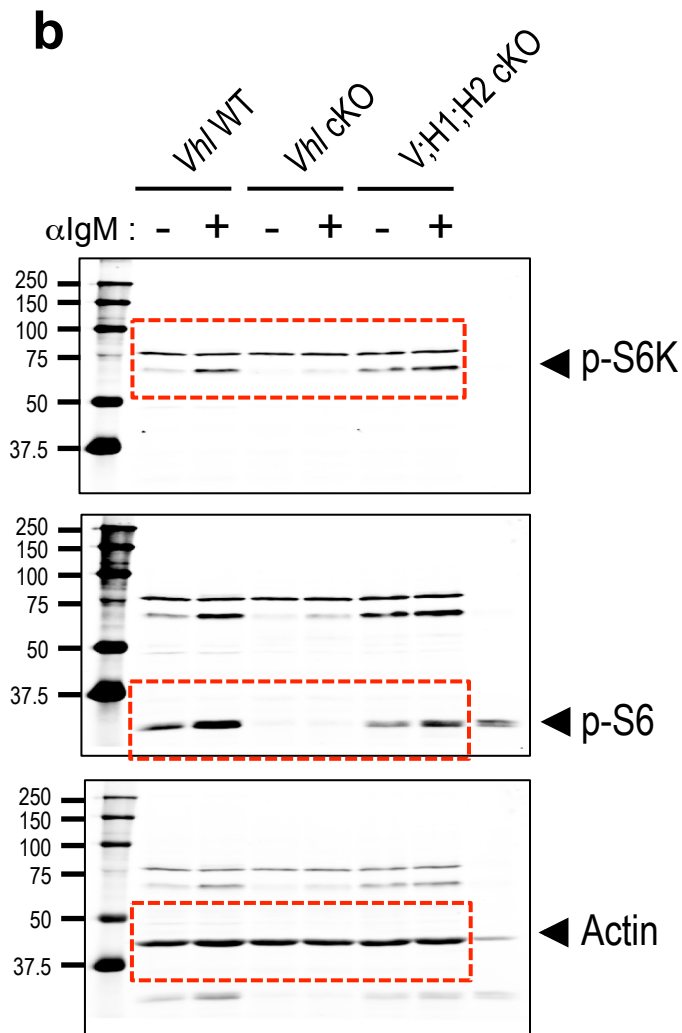

**Fig. 4**

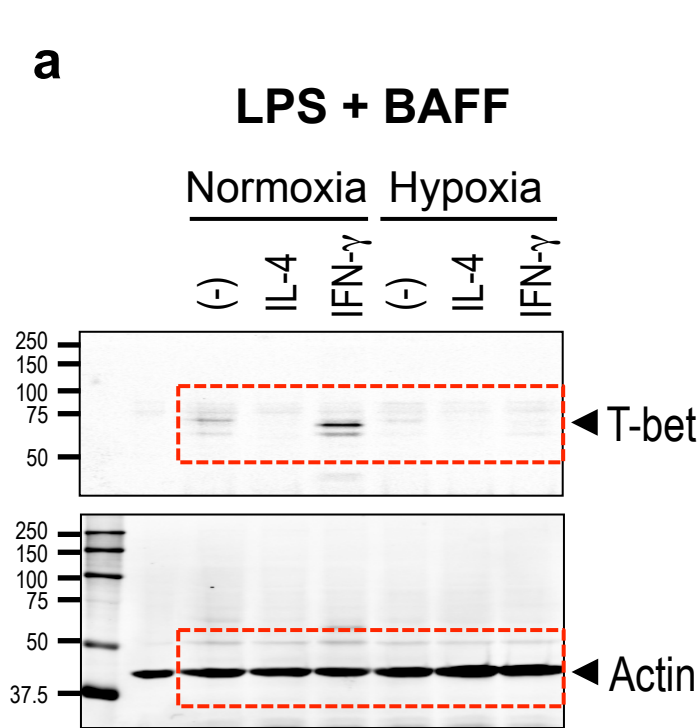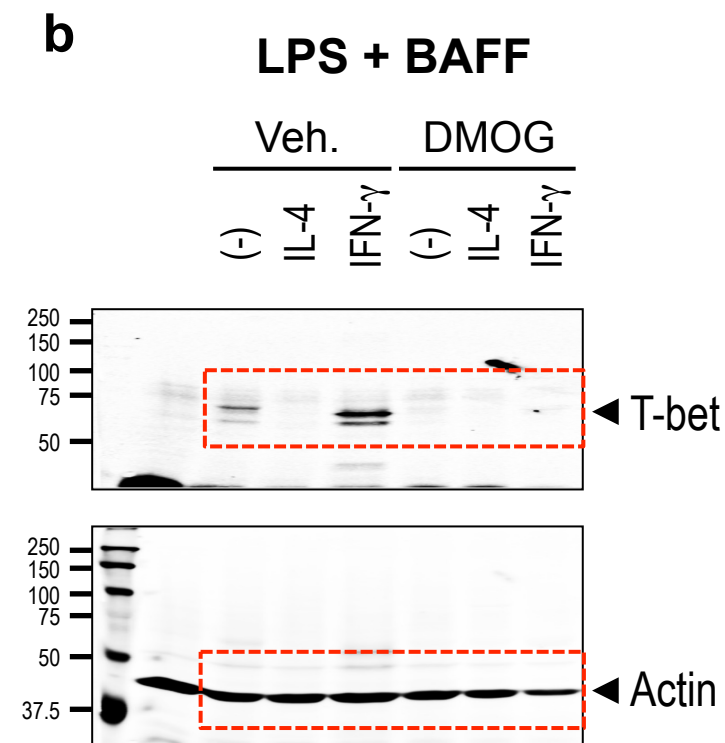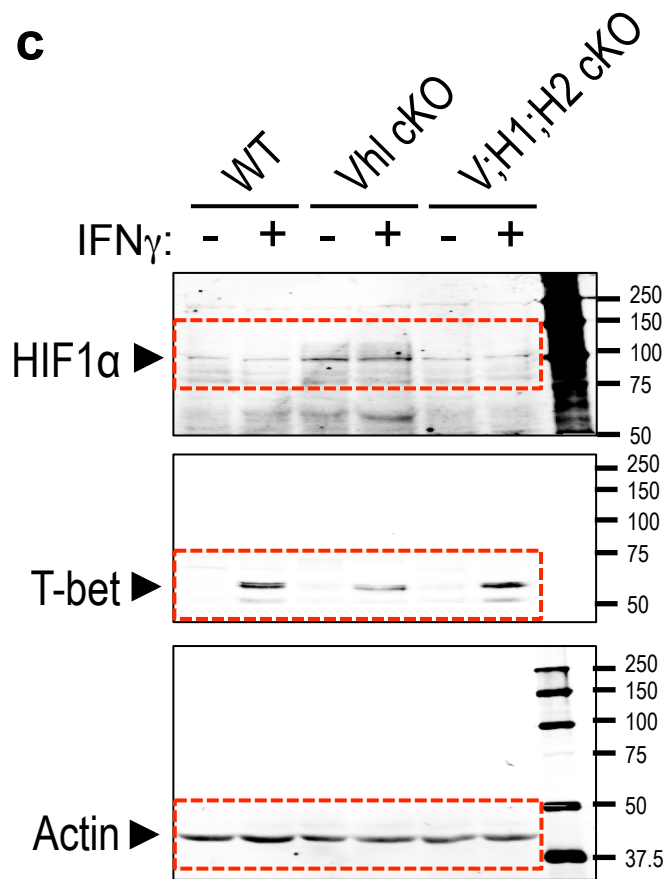

**Extended Data Fig. 4**

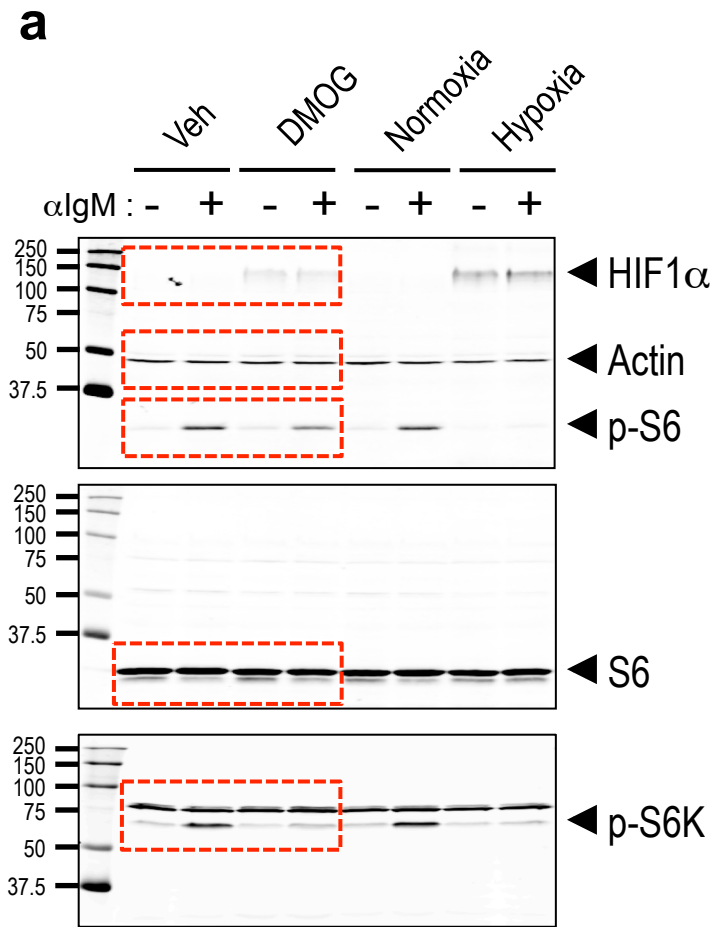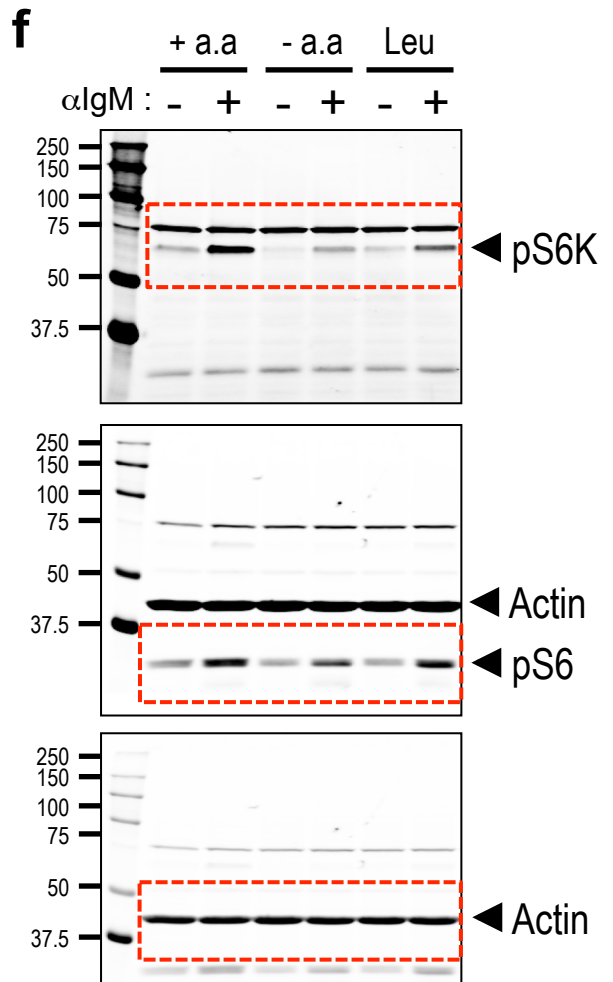

**Extended Data Fig. 7**

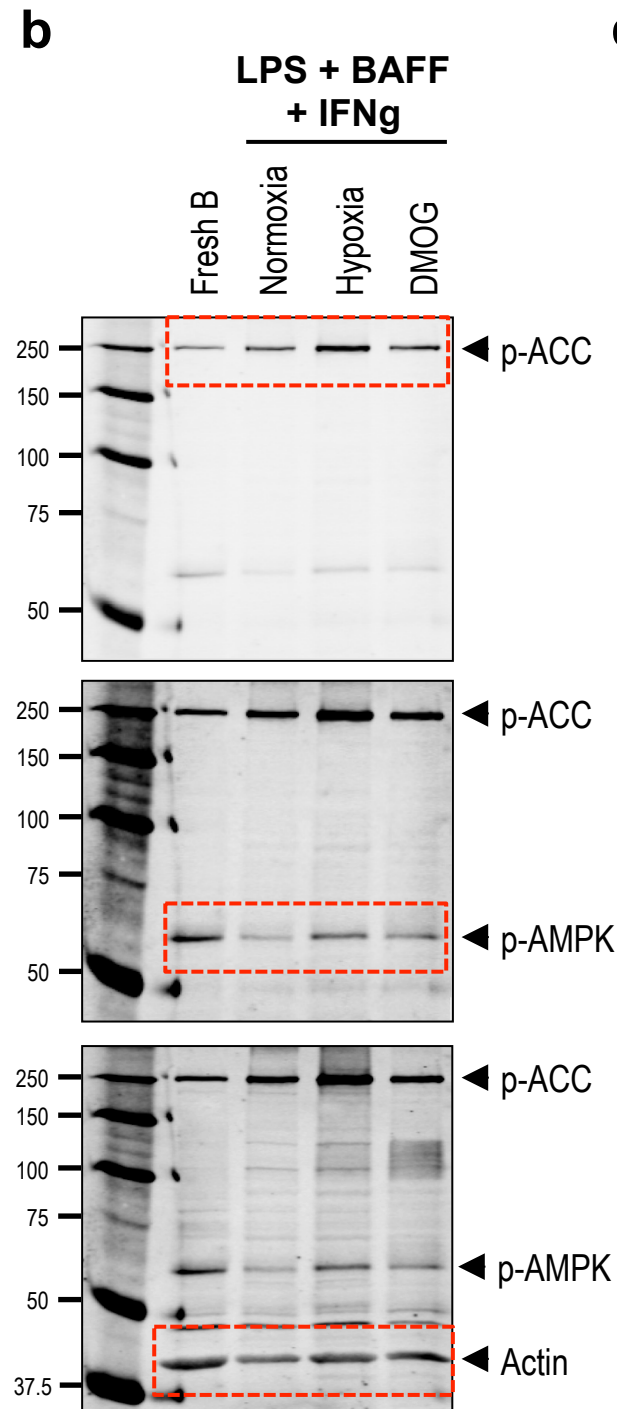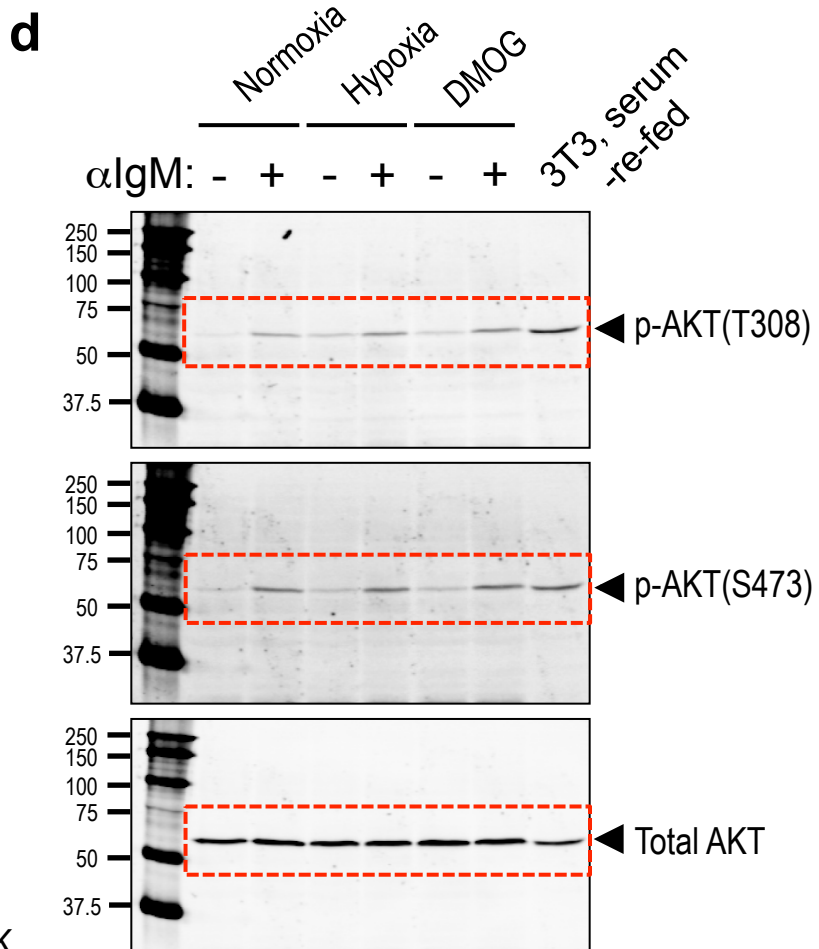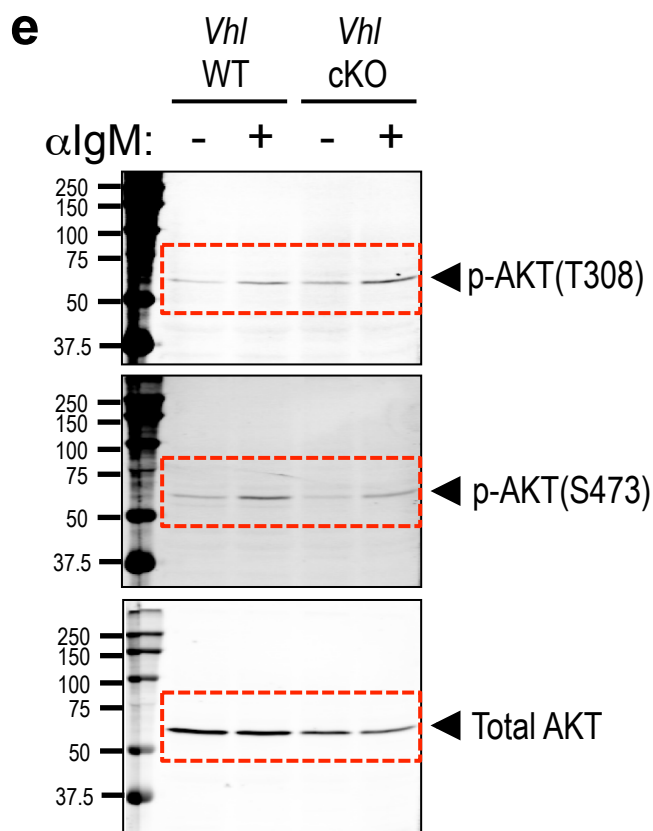

**Extended Data Fig. 8**

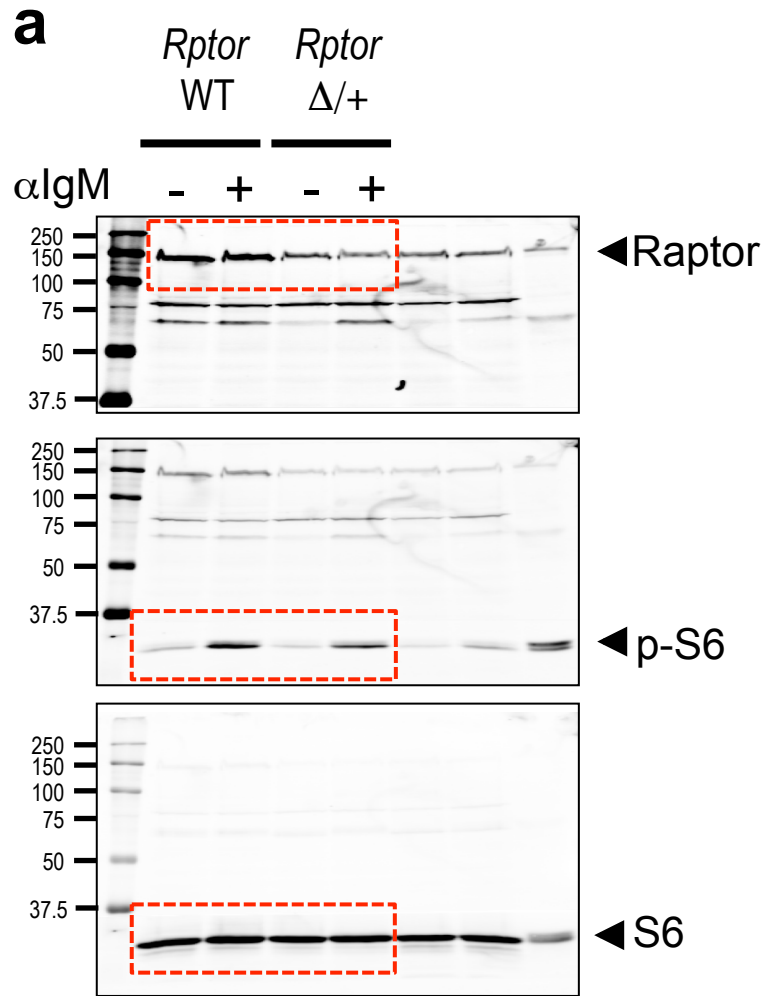

**Extended Data Fig. 9**

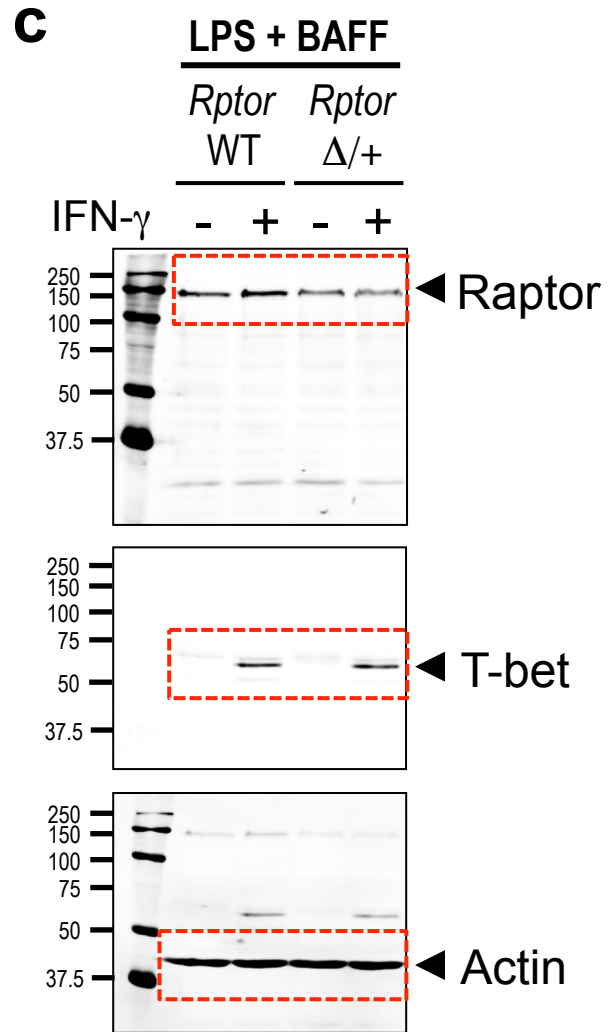

**Extended Data Fig. 10**

Supplement: NIHMS806888-supplement-1.pdf [file NIHMS806888-supplement-1.pdf]
